# Supplementary material
Source: HighWire-hosted journal article supplement (https://erj.ersjournals.com/content/52/5/1800876)
Supplement: inline-supplementary-material-2 [file inline-supplementary-material-2.pdf]

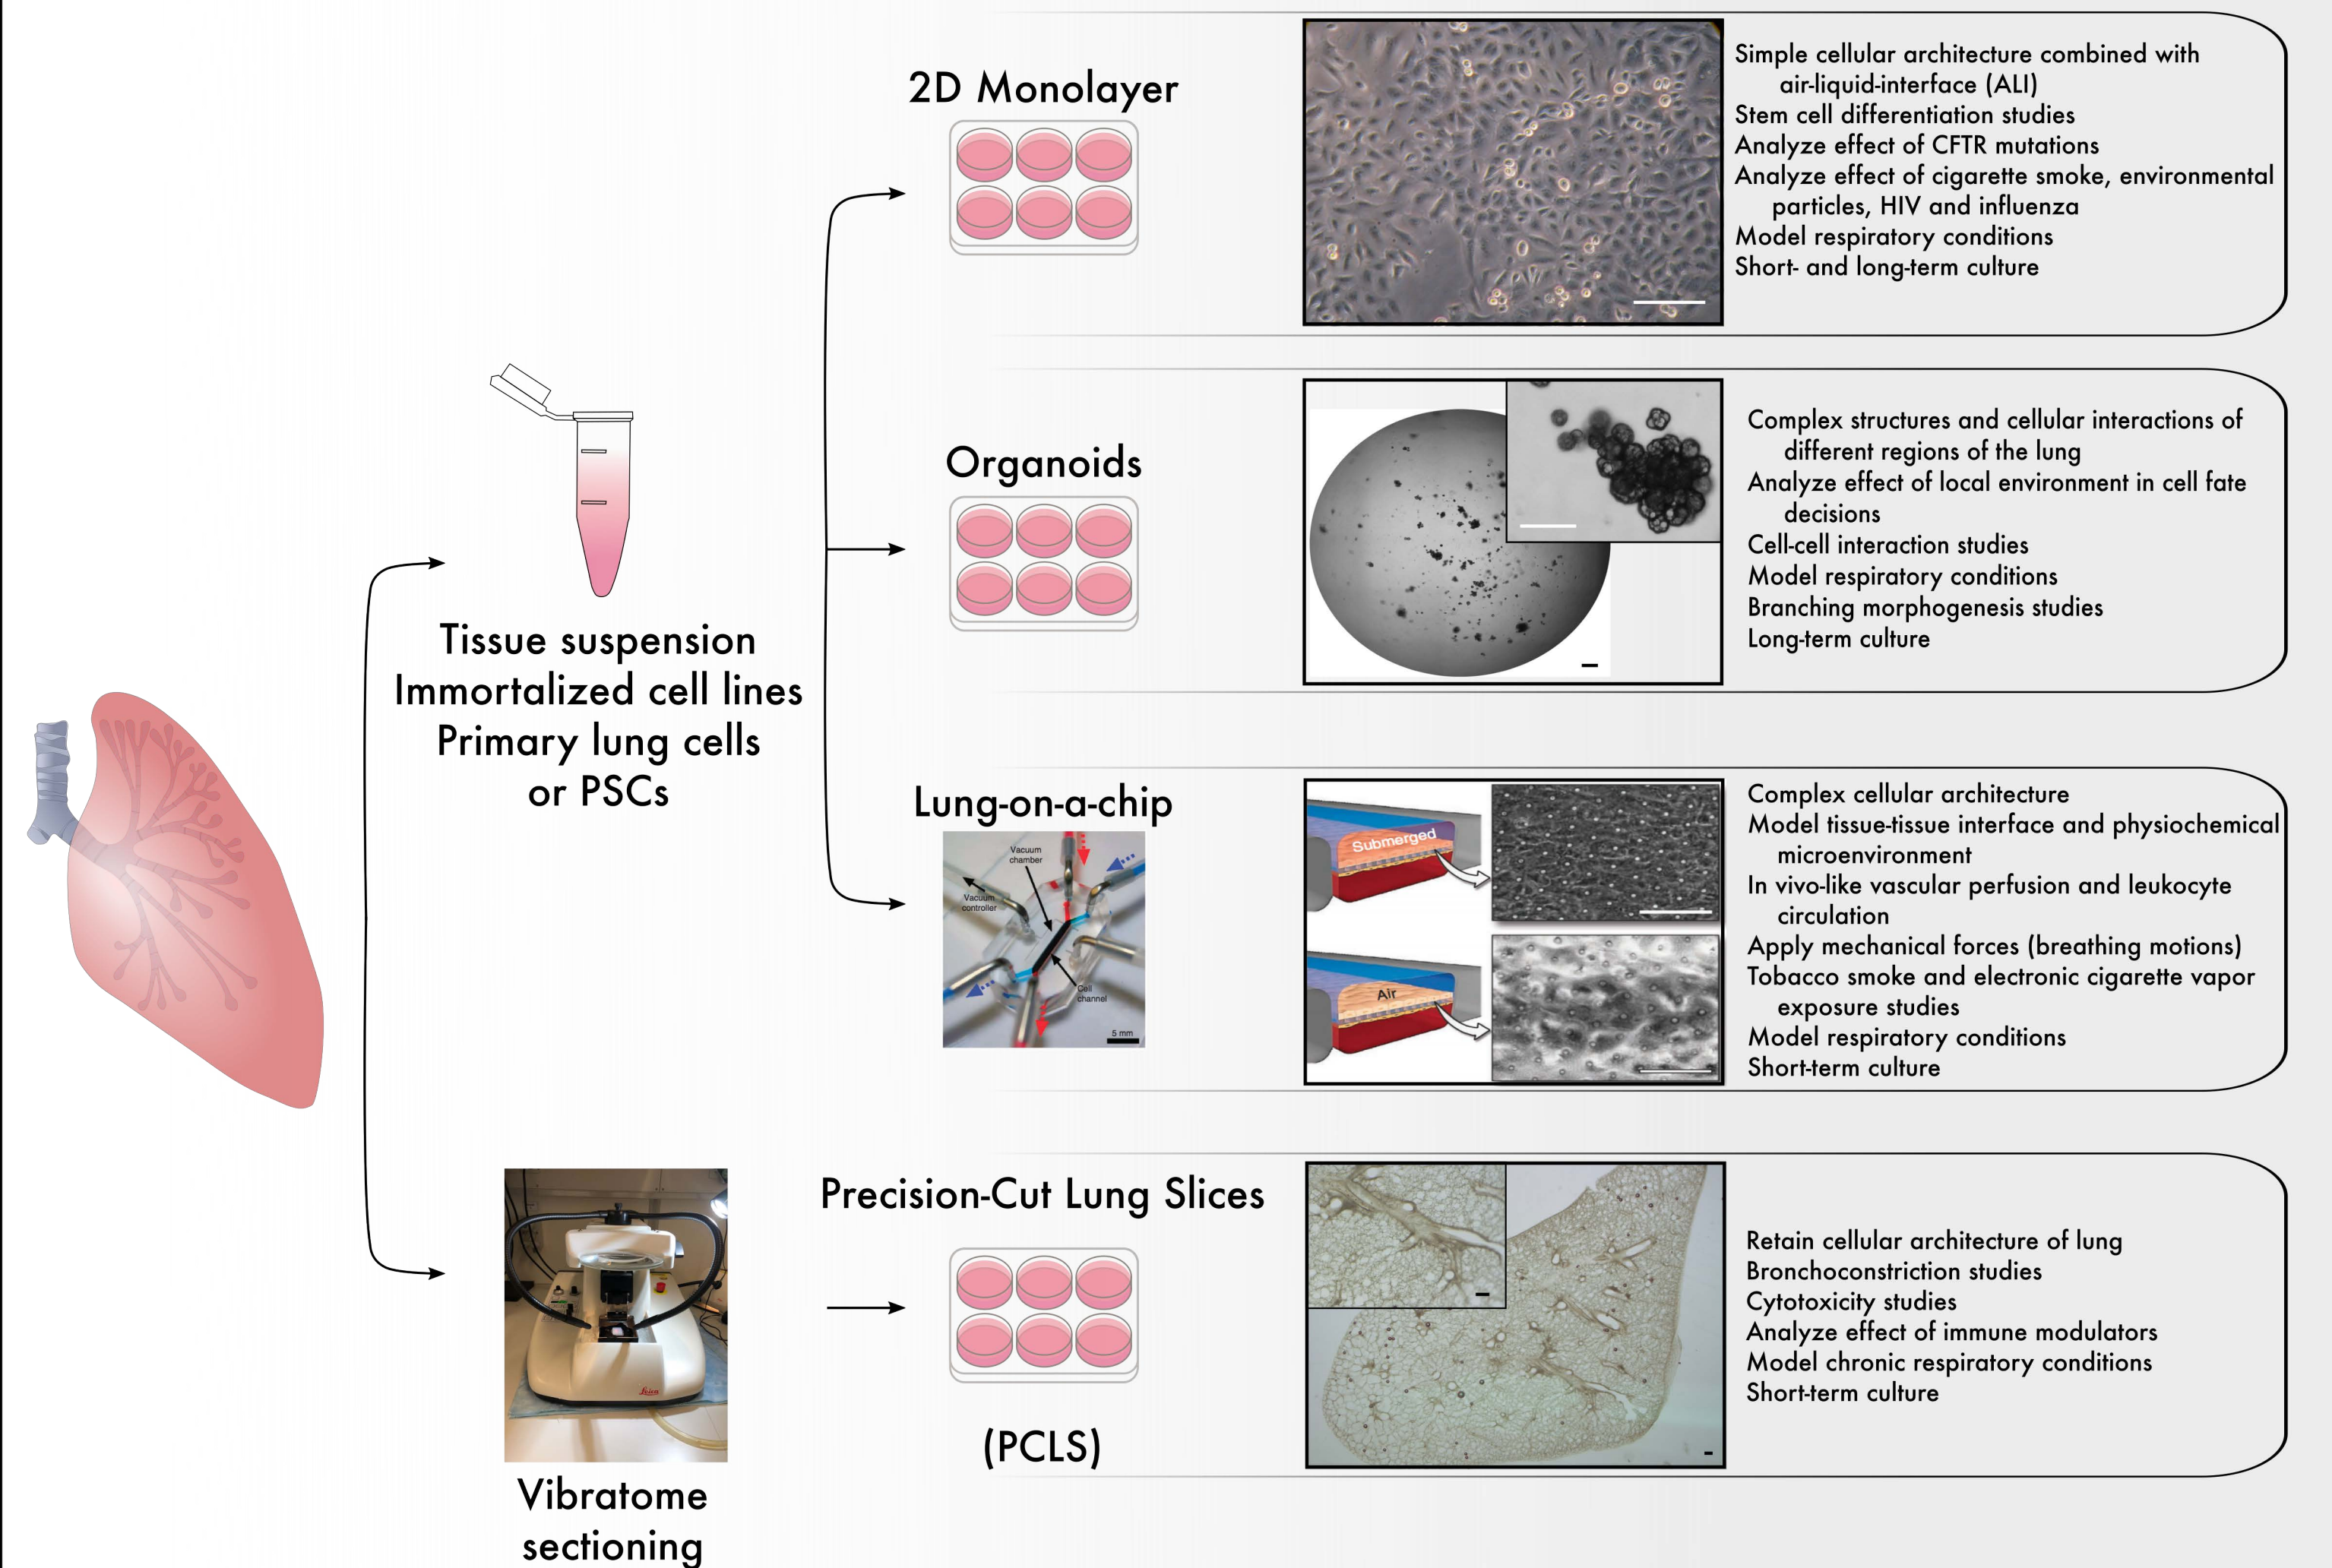

Supplementary Figure 1. Current lung-related culturing techniques and their potential to model in vivo respiratory events. Scale bar, 75um.
